# Supplementary material for: Catalytic transfer hydrogenation of ethyl levulinate to γ-valerolactone over zirconium-based metal–organic frameworks
Source: Royal Society of Chemistry journal article supplement (doi:10.1039/c6gc00524a), 2016-01-01
Supplement: c6gc00524a1.pdf [file c6gc00524a1.pdf]

## Supplementary Information

### Catalytic Transfer Hydrogenation of Ethyl Levulinate to $\gamma$ -Valerolactone over Zirconium-based Metal-Organic Frameworks

Anil H. Valekar,<sup>a,c</sup> Kyung-Ho Cho,<sup>a</sup> Sachin. K. Chitale,<sup>a,c</sup> Do-Young Hong,<sup>a,c</sup> Ga-Young Cha,<sup>a,c</sup> U-Hwang Lee,<sup>a,c</sup> Dong Won Hwang,<sup>a,c</sup> Christian Serre,<sup>d</sup> Jong-San Chang\*<sup>a,b</sup> and Young Kyu Hwang\*<sup>a,c</sup>

<sup>a</sup> *Research Center for Nanocatalysts, Korea Research Institute of Chemical Technology, Daejeon 305-600, Korea*

<sup>b</sup> *Department of Chemistry, Sungkyunkwan University, Suwon 440-476, Korea*

<sup>c</sup> *Department of Green Chemistry and Environmental Biotechnology, University of Science and Technology (UST), 217 Gajeong-Ro, Yuseong, Daejeon 305-350, Korea*

<sup>d</sup> *Institut Lavoisier, UMR CNRS 8180, Universite de Versailles St-Quentin Yvelines, 45 Avenue des Etats-Unis, 78035 Versailles Cedex, France*

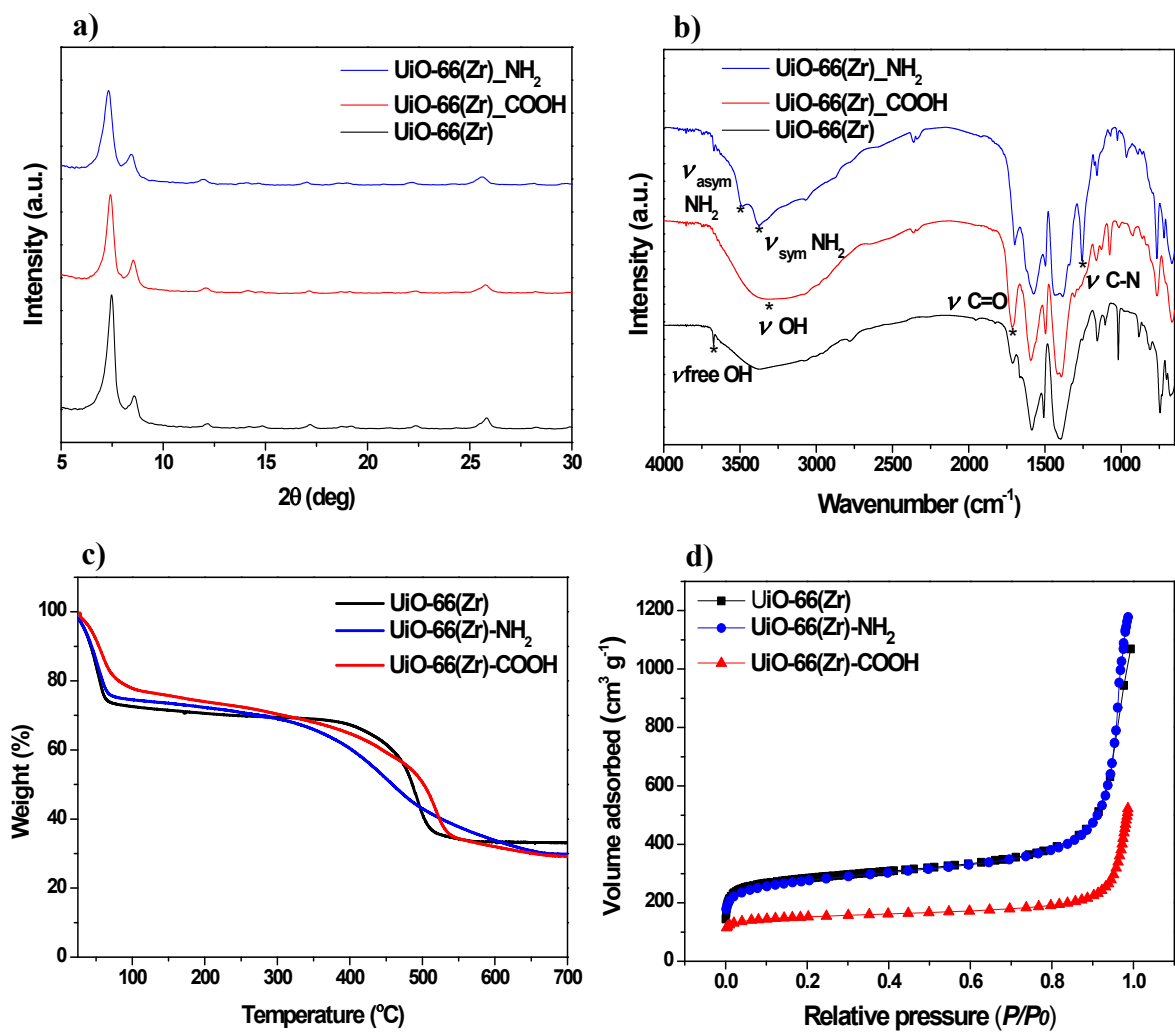

**Fig. S1** a) XRD patterns, b) FTIR graphs, c) TGA curves, and d) N<sub>2</sub> adsorption at 77 K of UiO-66(Zr) and its functionalized analogs

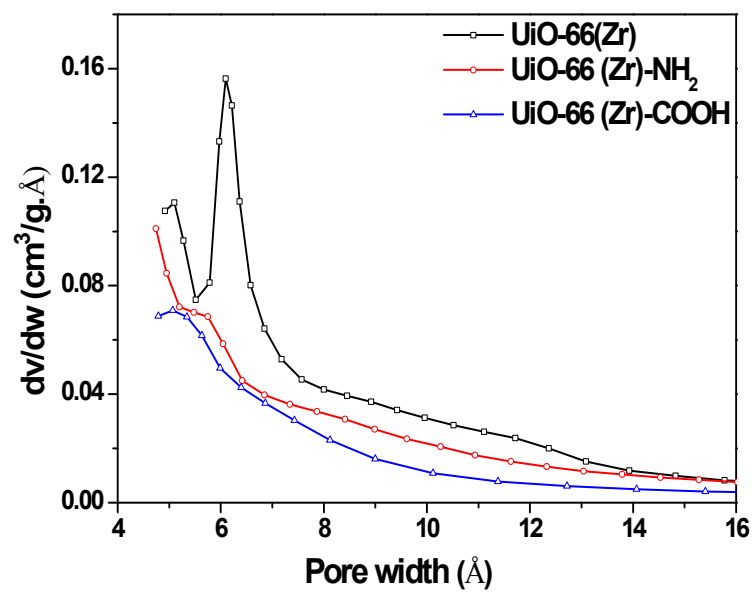

**Fig. S2** Micropore size distribution of UiO-66(Zr) and its functionalized analogs calculated from Ar-sorption by using Horvath-Kawazoe method.

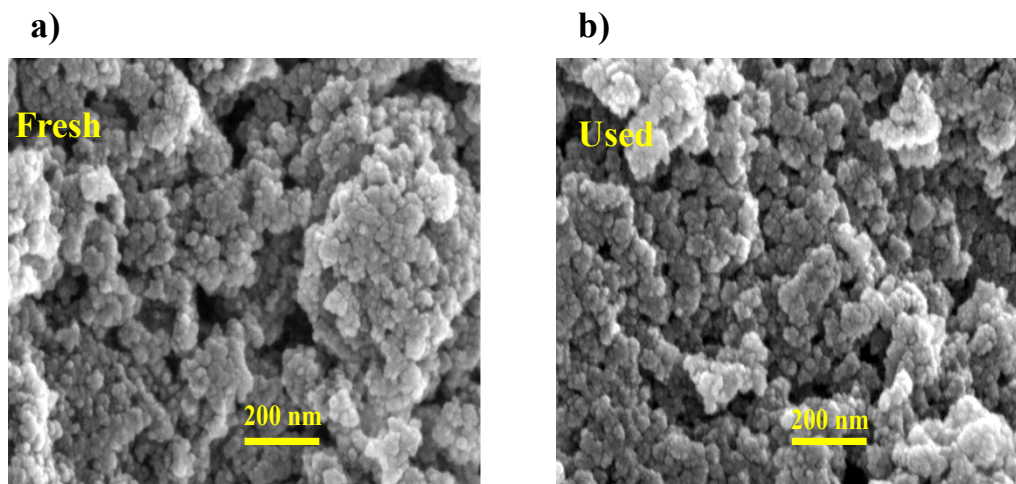

**Fig. S3** SEM images of a) fresh and b) used UiO-66(Zr) catalyst .

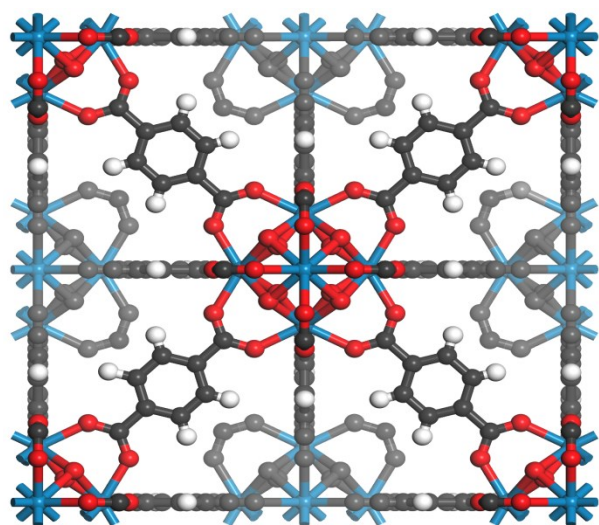

**UiO-66(Zr)**

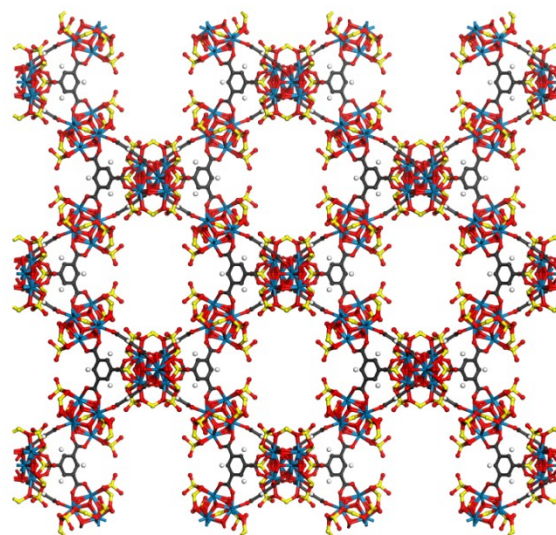

**MOF-808**

**Fig. S4** Representative structures of Zr-MOFs .

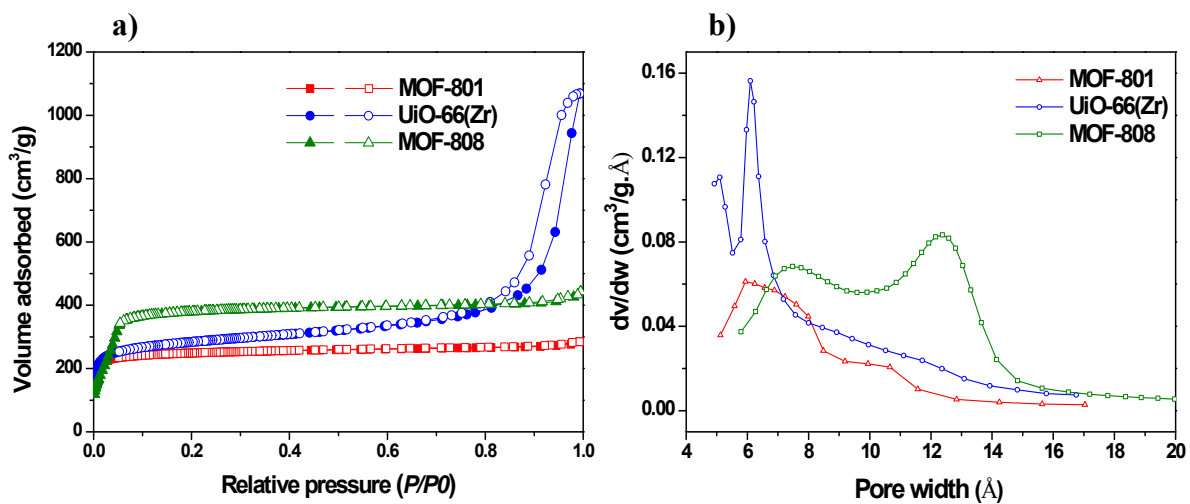

**Fig. S5** a) N<sub>2</sub> adsorption isotherms at 77 K and b) micropore pore size distribution of Zr-MOFs calculated from Ar-sorption by using Horvath-Kawazoe method.

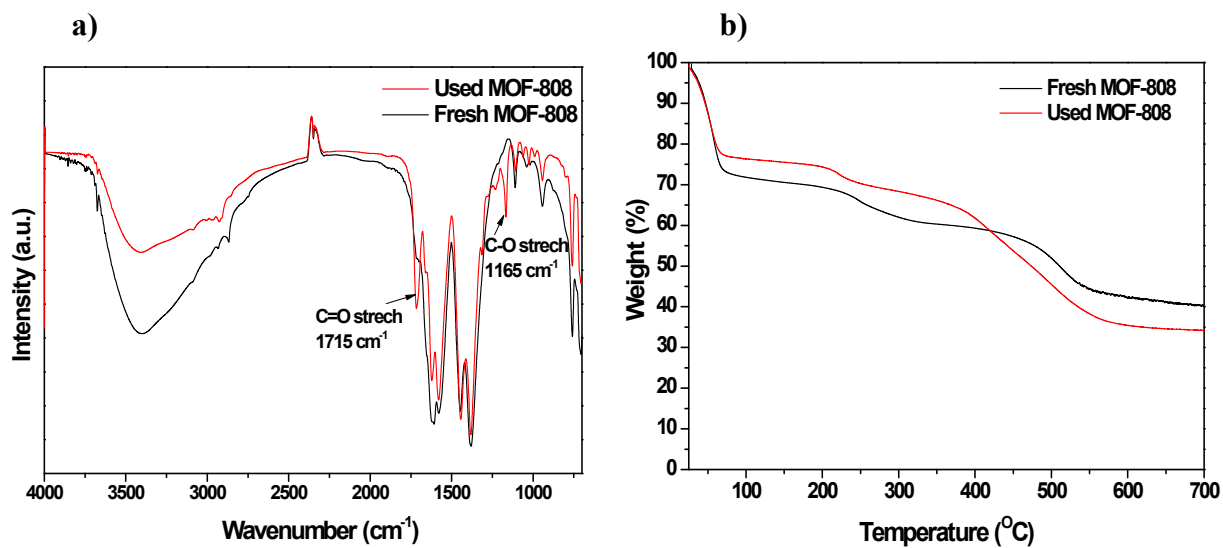

**Fig.S6** a) FTIR patterns and b) TG curves of MOF-808 before and after reaction with LA at  $82^{\circ}\text{C}$ .

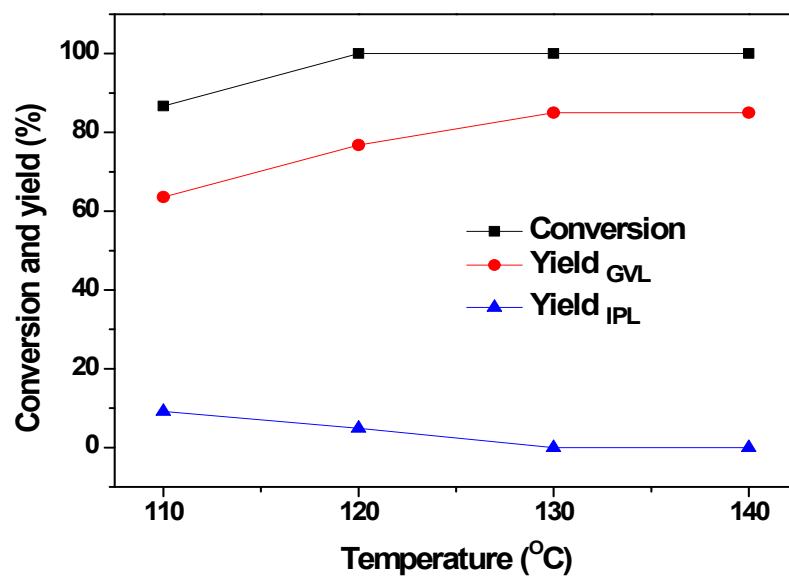

**Fig.S7** Effect of reaction temperature in CTH of EL to GVL over MOF-808: Reaction conditions: EL 4 mmol, isopropanol; 400 mmol, catalyst 0.2 g, naphthalene 0.24 g, and reaction time 3 h.



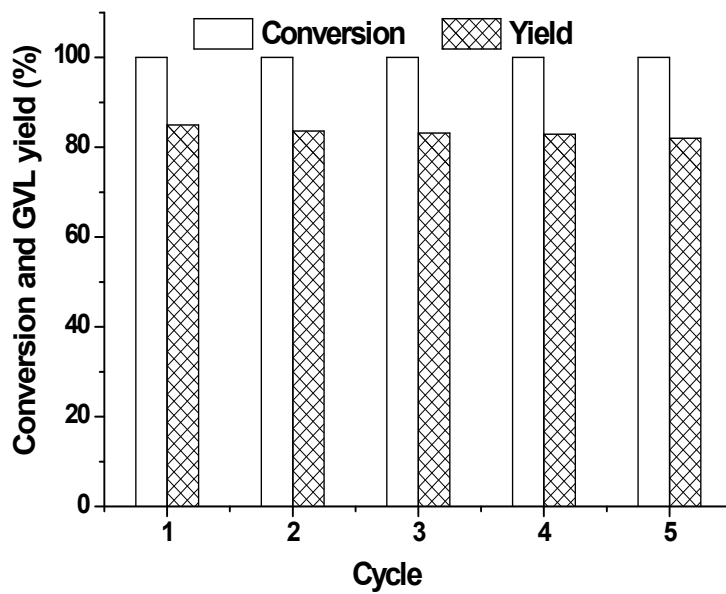

**Fig. S8** Recycle test of MOF-808 catalyst. Reaction conditions: EL 4 mmol; isopropanol 400 mmol; catalyst 0.2 g; naphthalene 0.24 g; reaction temperature 130°C; reaction time 3 h.

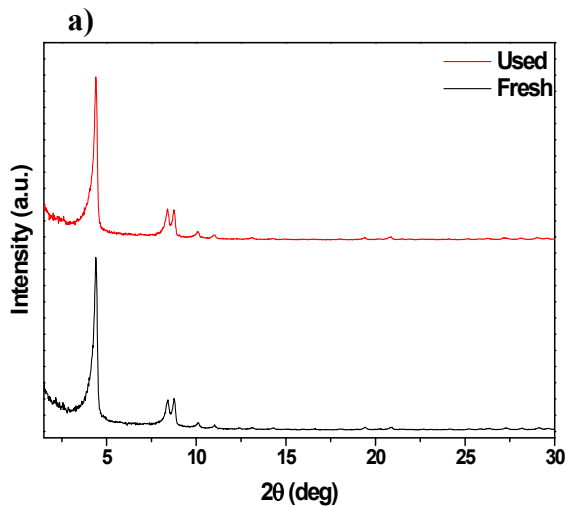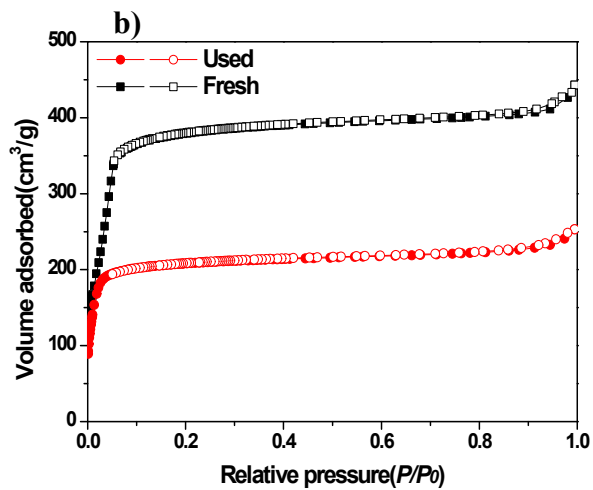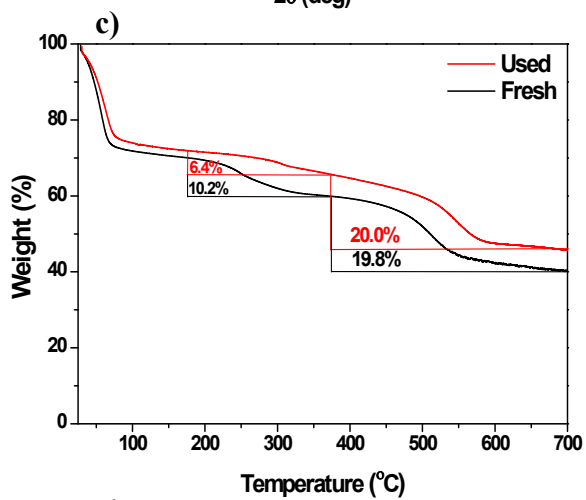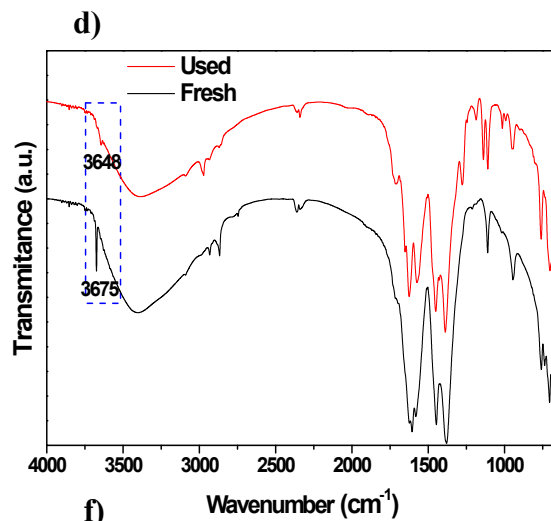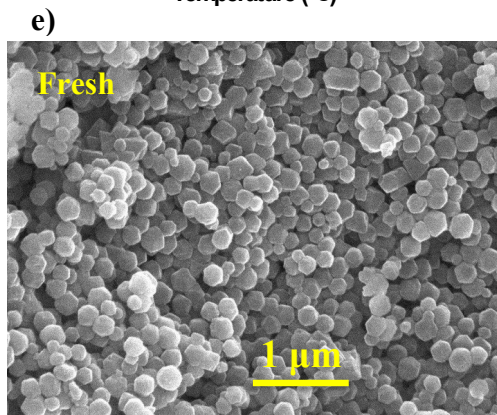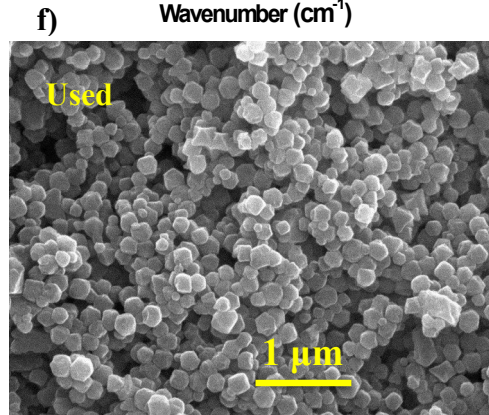

**Fig. S9** The characterizations of fresh and used MOF-808 after 5 cycles a) XRD pattern, b) N<sub>2</sub> adsorption-desorption isotherm at 77 K, c) TGA curves, d) FTIR patterns, and SEM images e) Fresh and f) Used

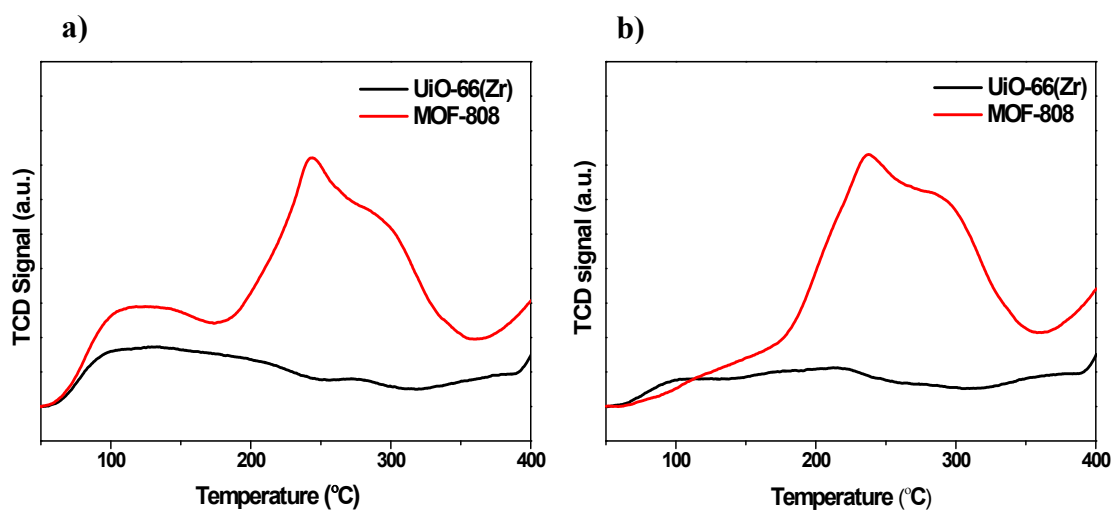

**Fig.S10** a) NH<sub>3</sub>-TPD and b) CO<sub>2</sub>-TPD of MOF-808(Zr) and UiO-66(Zr)

**Table S1** ICP and elemental analysis of fresh and used Zr-MOFs after five recycle tests.

| Catalyst         | Zr (Wt.%) | C (Wt.%) | H (Wt.%) |
|------------------|-----------|----------|----------|
| Fresh UiO-66(Zr) | 30.7      | 29.2     | 2.9      |
| Used UiO-66(Zr)  | 36.5      | 23.3     | 2.7      |
| Fresh MOF-808    | 32.8      | 22.2     | 3.0      |
| Used MOF-808     | 36.2      | 21.9     | 2.8      |

**Table S2** Porosity data of various catalysts (mentioned in Table 3) used for CTH of EL/LA to GVL

| Entry | Catalyst             | $S_{\text{BET}}$<br>( $\text{m}^2/\text{g}$ ) | PV<br>( $\text{cm}^3/\text{g}$ ) | PD<br>(nm) | Reference  |
|-------|----------------------|-----------------------------------------------|----------------------------------|------------|------------|
| 1     | MOF-808              | 1450                                          | 0.44                             | 0.74, 1.25 | This study |
| 2     | UiO-66(Zr)           | 1046                                          | 1.65                             | 0.6        | This study |
| 3     | MOF-801              | 990                                           | 0.44                             | 0.6        | This study |
| 4     | ZrO <sub>2</sub>     | 37                                            | 0.11                             | 2.5, 3.7   | This study |
| 5     | ZrO(OH) <sub>2</sub> | 250                                           | 0.19                             | 3.8        | This study |
| 6     | Zr-HBA               | 87.3                                          | 0.21                             | 8          | [34]       |
| 7     | Zr-PhyA              | 215                                           | 0.42                             | 8.5        | [39]       |
| 8     | Zr-Beta              | 474                                           | 0.27                             | ---        | [42]       |
